# Supplementary material for: Generative aptamer discovery using RaptGen
Source: PubMed Central journal article supplement (PMC10766510; doi:10.1038/s43588-022-00249-6), 2022-06-02
Supplement: 43588_2022_249_MOESM3_ESM.pdf [file 43588_2022_249_MOESM3_ESM.pdf]

| ID to discriminate every tested sequence | Which method used to select; BO: Bayesian Optimization, GMM: Gaussian Mixture Model | The length of a profile HMM model | The maximum probable pattern generated from profile HMM model. The asterisk indicates insertion. | The maximum probable sequence derived from "max_model" | The log probability of a sequence generated from the profile HMM | Normalized binding affinity of the proposed sequence | The x position where the profile HMM model was taken | The y position where the profile HMM model was taken | The length of the derived sequence | Base pairing probability matrix (upper-right); Secondary structure (lower-left) | Secondary structure calculated by CentroidFold[*1] [*1]: <a href="https://doi.org/10.1186/gb-2014-15-1-r16">https://doi.org/10.1186/gb-2014-15-1-r16</a> | Structural profiles calculated by CapR[*2], where the horizontal axis show positions of sequence [*2]: <a href="https://doi.org/10.1186/gb-2014-15-1-r16">https://doi.org/10.1186/gb-2014-15-1-r16</a> | Secondary structure calculated by RNAfold[*3] [*3]: <a href="https://doi.org/10.1186/1748-7188-6-26">https://doi.org/10.1186/1748-7188-6-26</a> |                              |
|------------------------------------------|-------------------------------------------------------------------------------------|-----------------------------------|--------------------------------------------------------------------------------------------------|--------------------------------------------------------|------------------------------------------------------------------|------------------------------------------------------|------------------------------------------------------|------------------------------------------------------|------------------------------------|---------------------------------------------------------------------------------|----------------------------------------------------------------------------------------------------------------------------------------------------------|--------------------------------------------------------------------------------------------------------------------------------------------------------------------------------------------------------|-------------------------------------------------------------------------------------------------------------------------------------------------|------------------------------|
| id                                       | data                                                                                | method                            | target_len                                                                                       | max_model                                              | max_seq                                                          | log_proba                                            | normalized                                           | pos_x                                                | pos_y                              | seq_len                                                                         | base_pairing_probabilities                                                                                                                               | secondary_structure                                                                                                                                                                                    | CapR                                                                                                                                            | secondary_structure(RNAfold) |
| A-PC                                     | A                                                                                   |                                   |                                                                                                  |                                                        | GCGGAGAUUCUGAGGGUUCUCCUGUUCAG                                    |                                                      | 100                                                  |                                                      |                                    |                                                                                 |                                                                                                                                                          |                                                                                                                                                                                                        |                                                                                                                                                 |                              |
| A-BO-3                                   | A                                                                                   | BO                                | 30                                                                                               | GUAGAGAUUCUGAGGGUUCUCCUGU*CUA                          | GUAGAGAUUCUGAGGGUUCUCCUGUUCUA                                    | -14.35                                               | 100.6                                                | 1.26                                                 | -0.43                              | 30                                                                              |                                                                                                                                                          |                                                                                                                                                                                                        |                                                                                                                                                 |                              |
| A-BO-1                                   | A                                                                                   | BO                                | 30                                                                                               | GUAGAGAUUCUGAGGGUUCUCCUGU*CCC                          | GUAGAGAUUCUGAGGGUUCUCCUGUUGCCC                                   | -14.42                                               | 101.2                                                | 1.69                                                 | -0.55                              | 30                                                                              |                                                                                                                                                          |                                                                                                                                                                                                        |                                                                                                                                                 |                              |
| A-BO-0                                   | A                                                                                   | BO                                | 30                                                                                               | GUAGAGAUUCUGAGGGUUCUCCUGU*ACC                          | GUAGAGAUUCUGAGGGUUCUCCUGUUGACC                                   | -14.42                                               | 102.5                                                | 1.55                                                 | -0.20                              | 30                                                                              |                                                                                                                                                          |                                                                                                                                                                                                        |                                                                                                                                                 |                              |
| A-BO2-8                                  | A                                                                                   | BO                                | 30                                                                                               | GGUAGAGAUUCUGAGGGUUCUCCUGUUCUA                         | GGUAGAGAUUCUGAGGGUUCUCCUGUUCUA                                   | -16.12                                               | 105.8                                                | 0.90                                                 | -0.44                              | 30                                                                              |                                                                                                                                                          |                                                                                                                                                                                                        |                                                                                                                                                 |                              |
| A-GMM-1                                  | A                                                                                   | GMM                               | 30                                                                                               | GUAGAGAUUCUGAGGGUUCUCCUGCUAUA                          | GUAGAGAUUCUGAGGGUUCUCCUGCUAUA                                    | -13.33                                               | 107.1                                                | 1.36                                                 | 0.22                               | 29                                                                              |                                                                                                                                                          |                                                                                                                                                                                                        |                                                                                                                                                 |                              |
| A-BO2-7                                  | A                                                                                   | BO                                | 30                                                                                               | GUAGAGAUUCUGAGGGUUCUCCUGU*CCA                          | GUAGAGAUUCUGAGGGUUCUCCUGUUGCCA                                   | -14.43                                               | 116.2                                                | 1.51                                                 | -0.63                              | 30                                                                              |                                                                                                                                                          |                                                                                                                                                                                                        |                                                                                                                                                 |                              |
| A-BO2-2                                  | A                                                                                   | BO                                | 30                                                                                               | GUAGAGAUUCUGAGGGUUCUCCUGU*JACA                         | GUAGAGAUUCUGAGGGUUCUCCUGUUAACA                                   | -13.88                                               | 119.8                                                | 1.29                                                 | -0.08                              | 29                                                                              |                                                                                                                                                          |                                                                                                                                                                                                        |                                                                                                                                                 |                              |

| ID to discriminate every tested sequence | A: Dataset A<br>B: Dataset B | Which method used to select;<br>BO: Bayesian Optimization,<br>GMM: Gaussian Mixture Model | The length of a profile HMM model | The maximum probable pattern generated from profile HMM model. The asterisk indicates insertion. | The maximum probable sequence derived from "max_model" | The log probability of a sequence generated from the profile HMM | Normalized binding affinity of the proposed sequence | The x position where the profile HMM model was taken | The y position where the profile HMM model was taken | The length of the derived sequence | Base pairing probability matrix (upper-right);<br>Secondary structure (lower-left) | Secondary structure calculated by CentroidFold[*1] [*1]: <a href="https://doi.org/10.1093/bioinformatics/btn601">https://doi.org/10.1093/bioinformatics/btn601</a> | Structural profiles calculated by CapR[*2], where the horizontal axis show positions of sequence [*2]: <a href="https://doi.org/10.1186/gb-2014-15-1-r16">https://doi.org/10.1186/gb-2014-15-1-r16</a> | Secondary structure calculated by RNAfold[*3] [*3]: <a href="https://doi.org/10.1186/1748-7188-6-26">https://doi.org/10.1186/1748-7188-6-26</a> |
|------------------------------------------|------------------------------|-------------------------------------------------------------------------------------------|-----------------------------------|--------------------------------------------------------------------------------------------------|--------------------------------------------------------|------------------------------------------------------------------|------------------------------------------------------|------------------------------------------------------|------------------------------------------------------|------------------------------------|------------------------------------------------------------------------------------|--------------------------------------------------------------------------------------------------------------------------------------------------------------------|--------------------------------------------------------------------------------------------------------------------------------------------------------------------------------------------------------|-------------------------------------------------------------------------------------------------------------------------------------------------|
| id                                       | data                         | method                                                                                    | target_len                        | max_model                                                                                        | max_seq                                                | log_proba                                                        | normalized                                           | pos_x                                                | pos_y                                                | seq_len                            | base_pairing_probabilities                                                         | secondary_structure                                                                                                                                                | CapR                                                                                                                                                                                                   | secondary_structure(RNAfold)                                                                                                                    |
| B-PC                                     | B                            |                                                                                           |                                   |                                                                                                  | GCUGUGUCUACGUCCGGAUUGGGGACCGACGCGCCCAUG                |                                                                  | 100                                                  |                                                      |                                                      |                                    |                                                                                    |                                                                                                                                                                    |                                                                                                                                                                                                        |                                                                                                                                                 |
| B-BO-8                                   | B                            | BO                                                                                        | 40                                | U*C*C*CCC*CGCGCACAUUACGCAACACUCCCCCUGCC                                                          | UGCGCGCCCGCGCGCACAUUACGCAACACUCCCCCUGCC                | -24.20                                                           | 134.9                                                | 1.55                                                 | -0.53                                                | 40                                 |                                                                                    |                                                                                                                                                                    |                                                                                                                                                                                                        |                                                                                                                                                 |
| B-BO-9                                   | B                            | BO                                                                                        | 40                                | U*C*C*CCC*AGCGCACAUUACGUAAAAACCCCUACC                                                            | UGCGCGCCCGAGCGCACAUUACGUAAAAACCCCUACC                  | -23.65                                                           | 151.6                                                | 0.99                                                 | -1.17                                                | 38                                 |                                                                                    |                                                                                                                                                                    |                                                                                                                                                                                                        |                                                                                                                                                 |
| B-GMM-9                                  | B                            | GMM                                                                                       | 40                                | U*C*C*CCC*AGCGCACAUUACGCAAAAUCCCCCUGCC                                                           | UGCGCGCCCGAGCGCACAUUACGCAAAAUCCCCCUGCC                 | -24.47                                                           | 190.7                                                | 1.24                                                 | 0.07                                                 | 39                                 |                                                                                    |                                                                                                                                                                    |                                                                                                                                                                                                        |                                                                                                                                                 |
| B-GMM-4                                  | B                            | GMM                                                                                       | 40                                | U*C*C*CCC*AGCGCACAUUACGUAAAAACCCCUACC                                                            | UGCGCGCCCGAGCGCACAUUACGUAAAAACCCCUACC                  | -23.33                                                           | 229.1                                                | 1.10                                                 | -0.99                                                | 39                                 |                                                                                    |                                                                                                                                                                    |                                                                                                                                                                                                        |                                                                                                                                                 |
| B-BO-4                                   | B                            | BO                                                                                        | 40                                | U*C*C*CCC*AGCGCACAUUACGCAACACUCCCCCUGCC                                                          | UGCGCGCCCGAGCGCACAUUACGCAACACUCCCCCUGCC                | -23.80                                                           | 231.0                                                | 1.53                                                 | -0.81                                                | 39                                 |                                                                                    |                                                                                                                                                                    |                                                                                                                                                                                                        |                                                                                                                                                 |
| B-BO-5                                   | B                            | BO                                                                                        | 40                                | U*C*C*CCC*AGCGCACAUUACGUAAAAACCCCUACC                                                            | UGCGCGCCCGAGCGCACAUUACGUAAAAACCCCUACC                  | -25.79                                                           | 245.2                                                | 1.23                                                 | -0.68                                                | 40                                 |                                                                                    |                                                                                                                                                                    |                                                                                                                                                                                                        |                                                                                                                                                 |
